# Supplementary material
Source: HighWire-hosted journal article supplement (http://www.jrheum.org/highwire/filestream/34143/field_highwire_adjunct_files/0/171389DataSuppl.pdf)
Supplement: 171389DataSuppl.pdf [file 171389DataSuppl.pdf]

ONLINE SUPPLEMENTARY DATA

**Supplementary Table 1.** Baseline Characteristics of All Unmatched Statin-Initiators

| Baseline Characteristics                         | Unmatched Statin-Initiators |                                            |
|--------------------------------------------------|-----------------------------|--------------------------------------------|
|                                                  | Included (n=2,863)          | Excluded Due to Missing Covariates (n=475) |
| <b>Demographics</b>                              |                             |                                            |
| Age, years (mean)                                | 64.3                        | 63.6                                       |
| Sex (% male)                                     | 24.4                        | 26.5                                       |
| BMI, kg/m <sup>2</sup> (mean)                    | 27.5                        | 27.4                                       |
| <b>Systemic Autoimmune Rheumatic Disease (%)</b> |                             |                                            |
| Systemic lupus erythematosus                     | 47.7                        | 46.1                                       |
| Systemic sclerosis                               | 11.9                        | 13.5                                       |
| Sjogren's syndrome                               | 29.6                        | 28.2                                       |
| Dermatomyositis/polymyositis                     | 7.8                         | 7.8                                        |
| ANCA-associated vasculitis                       | 4.7                         | 7.1                                        |
| Behcet's disease                                 | 3.9                         | 2.9                                        |
| <b>Disease Duration (years)</b>                  | 12.4                        | 11.6                                       |
| <b>Smoking Status (%)</b>                        |                             |                                            |
| Current smokers                                  | 19.2                        | 19.9                                       |
| <b>Alcohol Use (%)</b>                           |                             |                                            |
| Current alcohol use                              | 69.4                        | 69.6                                       |
| <b>Medication Use (%)</b>                        |                             |                                            |
| Aspirin                                          | 40.2                        | 44.6                                       |
| Antihypertensive Medications                     | 72.6                        | 74.3                                       |
| Beta blockers                                    | 25.9                        | 29.3                                       |
| Calcium Channel Blockers                         | 32.9                        | 30.5                                       |
| Nitrates                                         | 10.6                        | 12.4                                       |
| ACE Inhibitors                                   | 31.5                        | 35.4                                       |
| NSAIDs                                           | 29.9                        | 28.0                                       |
| Loop Diuretics                                   | 14.8                        | 22.3                                       |
| Thiazide                                         | 20.5                        | 16.2                                       |
| Potassium-Sparing Diuretics                      | 5.0                         | 7.2                                        |
| Insulin                                          | 2.9                         | 4.2                                        |
| Anticoagulants                                   | 6.9                         | 8.6                                        |
| Glucocorticoids                                  | 29.4                        | 35.4                                       |
| <b>Comorbid conditions (%)</b>                   |                             |                                            |
| Myocardial Infarction                            | 9.0                         | 10.9                                       |
| Ischemic Heart Disease                           | 19.8                        | 24.8                                       |
| Peripheral Vascular Disease                      | 3.2                         | 4.2                                        |

|                                       |       |       |
|---------------------------------------|-------|-------|
| Valvular Heart Disease                | 3.9   | 4.4   |
| Stroke                                | 7.5   | 9.9   |
| Atrial Fibrillation                   | 4.0   | 6.7   |
| Hypertension                          | 53.9  | 46.3  |
| Congestive Heart Failure              | 4.7   | 4.0   |
| Angina                                | 9.6   | 11.4  |
| Other Cardiovascular Disease          | 3.1   | 3.2   |
| Venous Thromboembolism                | 6.5   | 4.4   |
| Varicose Veins                        | 11.9  | 9.1   |
| Hyperlipidemia                        | 20.3  | 18.7  |
| Diabetes                              | 17.5  | 14.9  |
| CKD ( $\geq$ stage 3)                 | 11.5  | 9.5   |
| Liver Disease                         | 4.4   | 3.8   |
| Cancer                                | 10.9  | 8.2   |
| Chronic Obstructive Pulmonary Disease | 6.1   | 6.7   |
| Infection/Pneumonia                   | 12.1  | 9.7   |
| Depression                            | 18.5  | 13.3  |
| <b>Health Care Utilization</b>        |       |       |
| General Practice Visits*              | 15.4  | 13.3  |
| Specialist Referrals*                 | 1.2   | 1.1   |
| Hospitalizations*                     | 0.9   | 0.9   |
| <b>Laboratory Measurements</b>        |       |       |
| Total Cholesterol (mg/dl)             | 235.6 | 239.2 |

\*Frequency during the past 2 years.

BMI, body mass index; NSAIDs, non-steroidal anti-inflammatory drugs; CKD, Chronic Kidney Disease.

**Supplementary Table 2.** Association Between Statin Initiation and All-Cause Mortality in Propensity Score-Matched Cohorts Excluding Systemic Autoimmune Rheumatic Disease Subgroups

| Excluded Subgroup  | Statin-Initiator (N=2,305) |                         | Non-Initiator (N=2,305) |                         | HR (95% CI)      |
|--------------------|----------------------------|-------------------------|-------------------------|-------------------------|------------------|
|                    | Deaths (N)                 | Mortality Rate/1,000 PY | Deaths (N)              | Mortality Rate/1,000 PY |                  |
| Vasculitis*        | 275                        | 25.4                    | 314                     | 30.9                    | 0.82 (0.70-0.96) |
| Myositis**         | 271                        | 25.2                    | 317                     | 30.9                    | 0.82 (0.69-0.96) |
| SLE                | 173                        | 28.8                    | 192                     | 34.8                    | 0.83 (0.68-1.02) |
| Sjogren's syndrome | 203                        | 24.5                    | 240                     | 29.8                    | 0.82 (0.68-0.99) |
| SSc                | 257                        | 24.6                    | 274                     | 27.8                    | 0.88 (0.75-1.05) |

\* Vasculitis includes Behcet's disease and ANCA-associated vasculitis

\*\*Myositis includes dermatomyositis and polymyositis

SLE, systemic lupus erythematosus; SSc, systemic sclerosis; PY, person-years
